# Supplementary material for: Association between Long-Term Exposure to Particulate Matter Air Pollution and Mortality in a South Korean National Cohort: Comparison across Different Exposure Assessment Approaches
Source: Int J Environ Res Public Health. 2017 Sep 23;14(10):1103. doi: 10.3390/ijerph14101103 (PMC5664604; doi:10.3390/ijerph14101103)

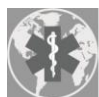

## Supplementary Materials: Association between long-term exposure to particulate matter air pollution and mortality in a South Korean national cohort: comparison across different exposure assessment approaches

Okjin Kim, Sun-Young Kim \*, Ho Kim \*

### Supplementary tables and figures

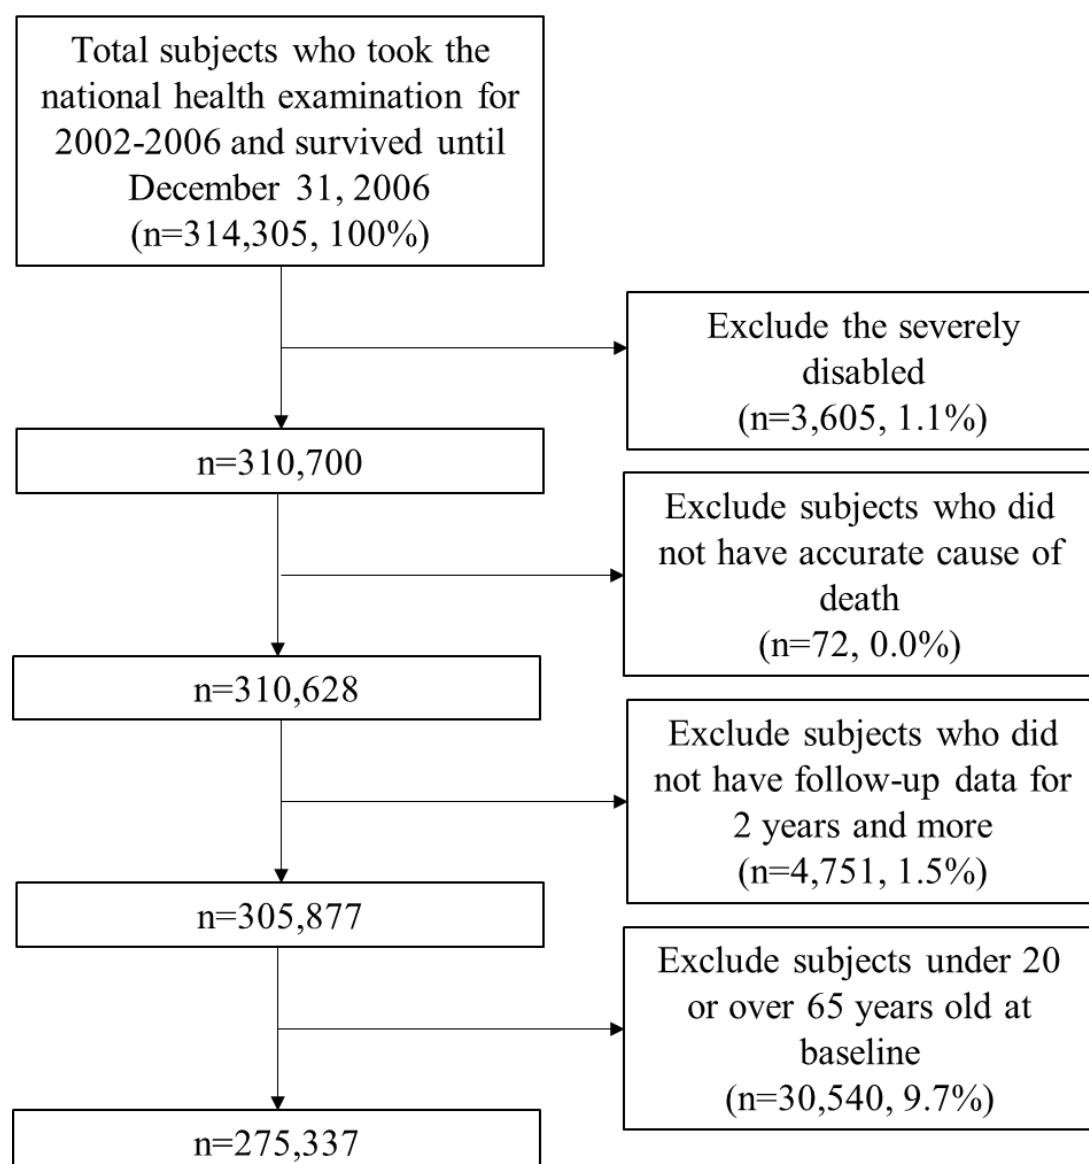

**Figure S1.** Schematic diagram of exclusion criteria and numbers of National Health Insurance Service- National Sample Cohort subjects included or excluded after the application of each criterion.



**Table S1.** Definition of four exposure assessment (EA) approaches.

| EA  | Time-varying exposure | Residential mobility |
|-----|-----------------------|----------------------|
| EA1 | O                     | O                    |
| EA2 | O                     | X                    |
| EA3 | X                     | O                    |
| EA4 | X                     | X                    |

Equations for individual-level 5-year PM<sub>10</sub> average concentrations by the four different exposure assessment (EA) approaches.

$PM_{t,s_t}$  : PM<sub>10</sub> predicted annual average concentration of each person at address  $s_t$  in year  $t$ .

$t$  : 2002 to 2006

$t^*$  : baseline year (2002)

$s^*$  : address in baseline year (2002)

$$EA1 = \frac{1}{5} \sum_{t=2002}^{2006} PM_{t,s_t}$$

$$EA2 = \frac{1}{5} \sum_{t=2002}^{2006} PM_{t,s^*}$$

$$EA3 = \frac{1}{5} \sum_{t=2002}^{2006} PM_{t^*,s_t}$$

$$EA4 = \frac{1}{5} \sum_{t=2002}^{2006} PM_{t^*,s^*} = PM_{t^*,s^*}$$

**Table S2.** Descriptive statistics and correlation coefficients of long-term PM<sub>10</sub> concentrations of 275,337 National Health Insurance Service- National Sample Cohort (NHIS-NSC) subjects across four exposure assessment (EA) approaches.

| EA  | PM <sub>10</sub> concentration (µg/m <sup>3</sup> ) |     |      |      | Correlation coefficient |      |      |      |
|-----|-----------------------------------------------------|-----|------|------|-------------------------|------|------|------|
|     | Mean                                                | SD  | Min  | Max  | EA1                     | EA2  | EA3  | EA4  |
| EA1 | 56.0                                                | 6.5 | 39.2 | 72.1 | 1.00                    |      |      |      |
| EA2 | 55.9                                                | 6.6 | 39.2 | 71.2 | 0.96                    | 1.00 |      |      |
| EA3 | 57.6                                                | 8.9 | 28.1 | 80.2 | 0.90                    | 0.87 | 1.00 |      |
| EA4 | 57.6                                                | 9.2 | 28.1 | 80.2 | 0.87                    | 0.91 | 0.95 | 1.00 |

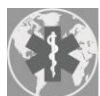

**Table S3.** Adjusted hazard ratios (HRs) and 95% confidence intervals (CIs) of non-accidental and cause-specific mortality for an increase of 10 µg/m<sup>3</sup> in the long-term concentration to PM<sub>10</sub> defined by four different exposure assessment (EA) approaches.

| EA <sup>2</sup> | HRs <sup>1</sup> (95% CIs) |                  |                  |                  |                  |                  |
|-----------------|----------------------------|------------------|------------------|------------------|------------------|------------------|
|                 | Non-accidental             | Cardiovascular   | Cerebrovascular  | Respiratory      | Cancer           | Lung cancer      |
| EA1             | 1.05 (0.99,1.11)           | 1.02 (0.90,1.16) | 1.14 (0.93,1.39) | 1.19 (0.91,1.57) | 1.02 (0.95,1.10) | 0.96 (0.82,1.13) |
| EA2             | 1.05 (0.99,1.11)           | 1.02 (0.90,1.16) | 1.12 (0.92,1.37) | 1.23 (0.93,1.63) | 1.02 (0.94,1.10) | 0.96 (0.81,1.13) |
| EA3             | 1.00 (0.96,1.04)           | 0.99 (0.90,1.08) | 1.07 (0.93,1.23) | 1.05 (0.87,1.27) | 0.98 (0.93,1.03) | 0.92 (0.82,1.04) |
| EA4             | 1.00 (0.97,1.05)           | 1.00 (0.91,1.09) | 1.08 (0.94,1.24) | 1.05 (0.87,1.27) | 0.99 (0.94,1.04) | 0.94 (0.84,1.05) |

<sup>1</sup> Effect estimates from our primary model (model 4) adjusting for sex, age, income, smoking, alcohol use, obese, exercise, and co-morbidity of cardiovascular disease, cerebrovascular disease, and diabetes, district-level percent of high school education completed or more, percent of the elderly, and gross regional domestic product.

<sup>2</sup> EA1: prediction and address in each year

EA2: prediction in each year and address at baseline

EA3: prediction at baseline and address in each year

EA4: prediction and address at baseline

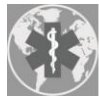

**Table S4.** Adjusted hazard ratios (HRs) and 95% confidence intervals (CIs) of mortality for an increase of 10  $\mu\text{g}/\text{m}^3$  in 12-year average  $\text{PM}_{10}$  concentrations<sup>1</sup> in 275,337 National Health Insurance Service- National Sample Cohort (NHIS-NSC) subjects for 2002-2013 in South Korea.

| Cause of mortality | HRs <sup>2</sup> (95% CIs) |
|--------------------|----------------------------|
| Non-accidental     | 1.07 (1.00,1.15 )          |
| Cardiovascular     | 1.04 (0.89,1.22 )          |
| Cerebrovascular    | 1.20 (0.94,1.54 )          |
| Respiratory        | 1.26 (0.90,1.77 )          |
| Cancer             | 1.04 (0.95,1.15 )          |
| Lung cancer        | 1.00 (0.81,1.22)           |

<sup>1</sup> 12-years average concentrations of  $\text{PM}_{10}$  at addresses at baseline in 2002.

<sup>2</sup> Adjusting for sex, age, income, smoking, alcohol use, obese, exercise, and co-morbidity of cardiovascular disease, cerebrovascular disease, and diabetes, district-level percent of high school education completed or more, percent of the elderly, and gross regional domestic product.

**Table S5.** Adjusted hazard ratios (HRs) and 95% confidence intervals (CIs) of mortality for an increase of 10  $\mu\text{g}/\text{m}^3$  in measurement-based long-term  $\text{PM}_{10}$  concentrations in 237,224<sup>2</sup> National Health Insurance Service- National Sample Cohort (NHIS-NSC) subjects for 2002-2013 in South Korea.

| Cause of mortality | HRs <sup>1</sup> (95% CIs)         |                   |
|--------------------|------------------------------------|-------------------|
|                    | Measurement-based $\text{PM}_{10}$ | EA1 <sup>2</sup>  |
| Non-accidental     | 1.04 (0.99,1.08 )                  | 1.07 (1.00,1.14 ) |
| Cardiovascular     | 1.02 (0.92,1.13 )                  | 1.05 (0.91,1.22 ) |
| Cerebrovascular    | 1.05 (0.90,1.24 )                  | 1.10 (0.87,1.39 ) |
| Respiratory        | 0.98 (0.79,1.22 )                  | 1.05 (0.76,1.45 ) |
| Cancer             | 1.01 (0.95,1.07 )                  | 1.02 (0.94,1.11 ) |
| Lung cancer        | 0.98 (0.86,1.12 )                  | 0.98 (0.81,1.19 ) |

<sup>1</sup> Adjusting for sex, age, income, smoking, alcohol use, obese, exercise, and co-morbidity of cardiovascular disease, cerebrovascular disease, and diabetes, district-level percent of high school education completed or more, percent of the elderly, and gross regional domestic product.

<sup>2</sup> Subjects who lived in the districts where there are regulatory air pollution monitoring sites.

**Table S6.** Adjusted hazard ratios (HRs) and 95% confidence intervals (CIs) of mortality for an increase of 10  $\mu\text{g}/\text{m}^3$  in the long-term  $\text{PM}_{10}$  concentrations from time-dependent Cox proportional hazards models.

| Cause of mortality | HRs <sup>1</sup> (95% CIs) |
|--------------------|----------------------------|
| Non-accidental     | 1.03 (0.96 ,1.11 )         |
| Cardiovascular     | 0.91 (0.77,1.06 )          |
| Cerebrovascular    | 1.07 (0.84,1.36 )          |
| Respiratory        | 1.01 (0.71,1.45 )          |
| Cancer             | 1.05 (0.96,1.16 )          |
| Lung cancer        | 1.00 (0.81,1.22 )          |

<sup>1</sup> Adjusting for sex, age, income, smoking, alcohol use, obese, exercise, and co-morbidity of cardiovascular disease, cerebrovascular disease, and diabetes, district-level percent of high school education completed or more, percent of the elderly, and gross regional domestic product.



**Table S7.** Adjusted hazard ratio (HRs) and 95% confidence interval (CIs) of mortality for an increase of 10  $\mu\text{g}/\text{m}^3$  in the long-term  $\text{PM}_{10}$  concentrations from Cox proportional hazards model incorporating random effects for subjects' residential districts at baseline.

| Cause of mortality | HRs <sup>1</sup> (95% CIs) |
|--------------------|----------------------------|
| Non-accidental     | 1.05 (0.99, 1.11)          |
| Cardiovascular     | 1.02 (0.90, 1.16)          |
| Cerebrovascular    | 1.14 (0.93, 1.39)          |
| Respiratory        | 1.19 (0.89, 1.58)          |
| Cancer             | 1.02 (0.95, 1.10)          |
| Lung cancer        | 0.96 (0.82, 1.13)          |

<sup>1</sup> Adjusting for sex, age, income, smoking, alcohol use, obese, exercise, and co-morbidity of cardiovascular disease, cerebrovascular disease, and diabetes, district-level percent of high school education completed or more, percent of the elderly, and gross regional domestic product.

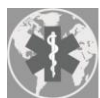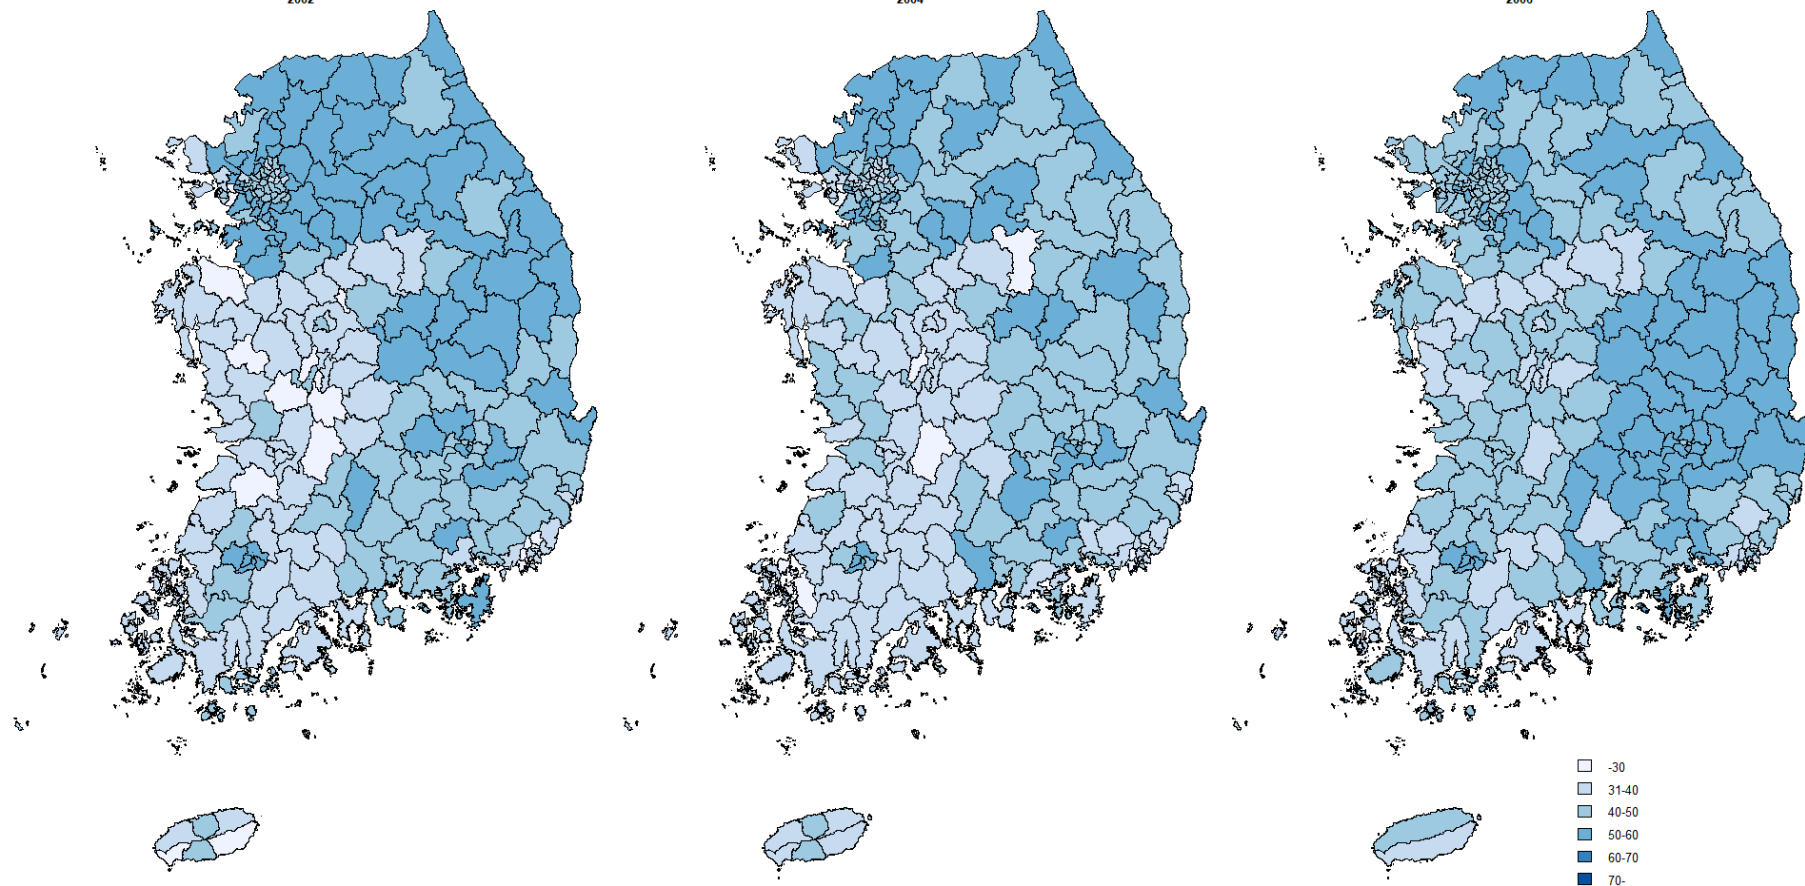

40  
41

**Figure S2.** Maps of predicted district-specific annual concentrations of PM<sub>10</sub> in 2010, South Korea.

**Table S8.** Summaries of previous cohort studies of the association between long-term exposure to PM<sub>10</sub> and mortality.

| Study                    | Cohort                                           | N of subjects | Measurements/<br>predictions | Time                | Space               | Percent change in mortality risk (95% confidence interval per 10 µg/m <sup>3</sup> increase in PM <sub>10</sub> ) |                |                                     |                  |                 |
|--------------------------|--------------------------------------------------|---------------|------------------------------|---------------------|---------------------|-------------------------------------------------------------------------------------------------------------------|----------------|-------------------------------------|------------------|-----------------|
|                          |                                                  |               |                              |                     |                     | All-causes                                                                                                        | Non-accidental | Cardiovascular<br>[cerebrovascular] | Respiratory      | Lung cancer     |
| Ueda et al, 2011 [1]     | Japan<br>≥ 30 years<br>nationwide                | 7,250         | Measurements                 | 24 year<br>average  | District            | -2 (-8, 4)                                                                                                        |                | -14 (-26, 1)                        |                  |                 |
| Fisher et al, 2015 [2]   | Netherland,<br>≥ 30 years,<br>nationwide         | 7,218,363     | Predictions                  | 1 year<br>average   | 100m x<br>100m grid |                                                                                                                   | 8 (7, 9)       | 6 (4, 8)                            | 13 (10, 17)      | 26 (21, 30)     |
| Zhang et al, 2011 [3]    | China<br>35-103 years,<br>5 districts            | 9,941         | Measurements                 | 1 year<br>average   | District            |                                                                                                                   |                | 55 (51, 60)                         |                  |                 |
| Zhou et al, 2014 [4]     | China<br>≥ 40 years<br>25 urban cities           | 71,431        | Measurements                 | 10 year<br>average  | City                | 0.4 (-0.1, 1)                                                                                                     |                | 1 (0.4, 1.7)                        | -0.2 (-0.9, 0.6) | 0.3 (-0.2, 0.9) |
| Carey et al, 2013 [5]    | England<br>40-89 years<br>nationwide             | 835,607       | Predictions                  | 1 year<br>average   | 1kmx1km<br>grid     | 7 (-1, 16)                                                                                                        |                | 7 (-0.3, 18)                        | 42 (29, 55)      | 7 (0, 14)       |
| Bentayeb et al, 2015 [6] | France<br>average 43.7<br>ages<br>nationwide     | 20,327        | Predictions                  | 20 year<br>average  | zip code<br>area    |                                                                                                                   | 17 (0, 37)     | 17 (-26, 84)                        | 0 (-32, 48)      |                 |
| Heinrich et al, 2013 [7] | German,<br>≥ 55 years<br>10 areas in 7<br>cities | 4,750         | Measurements                 | 1 year<br>average   | geocoded<br>address |                                                                                                                   | 22 (6, 41)     | 60 (25, 105)                        | -6 (-52, 85)     | 139 (34, 325)   |
| Beelen et al, 2014 [8]   | Europe<br>ESCAPE cohort                          | 367,251       | Predictions                  | 2.5 year<br>average |                     |                                                                                                                   | 4 (0, 9)       |                                     |                  |                 |
| Beelen et al, 2014 [9]   | Europe,<br>ESCAPE cohort                         | 367,383       | Predictions                  | 2.5 year<br>average |                     |                                                                                                                   |                | 2 (-8, 14)<br>[22 (-9, 63)]         |                  |                 |

1. Ueda, K.; Nagasawa, S.; Nitta, H.; Miura, K.; Ueshima, H. Exposure to particulate matter and long-term risk of cardiovascular mortality in Japan: NIPPON DATA80. *J. Atheroscler. Thromb.* **2012**, *19*, 246–254.
2. Crouse, D.L.; Peters, P.A.; Hystad, P.; Brook, J.R.; van Donkelaar, A.; Martin, R.V.; Villeneuve, P.J.; Jerrett, M.; Goldberg, M.S.; Pope, C.A. III; et al. Ambient PM<sub>2.5</sub>, O<sub>3</sub> and NO<sub>2</sub> exposures and associations with mortality over 16 years of follow-up in the Canadian Census Health and Environment Cohort (CanCHEC). *Environ. Health Persp.* **2015**, *123*, 1180–1186.
3. Zhang, P.; Dong, G.; Sun, B.; Zhang, L.; Chen, X.; Ma, N.; Yu, F.; Guo, H.; Huang, H.; Lee, Y.L.; et al. Long-term exposure to ambient air pollution and mortality due to cardiovascular disease and cerebrovascular disease in Shenyang, China. *PLoS ONE* **2011**, *6*, e20827.
4. Zhou, M.; Liu, Y.; Wang, L.; Kuang, X.; Xu, X.; Kan, H. Particulate air pollution and mortality in a cohort of Chinese men. *Environ. Pollut.* **2014**, *6*, 1–8.
5. 2010 Census. KOSIS. Available online, [http://kostat.go.kr/portal/korea/kor\\_nw/2/2/1/index.board?bmode=read&aSeq=250515&pageNo=21&rowNum=10&amSeq=&sTarget=&sTxt=](http://kostat.go.kr/portal/korea/kor_nw/2/2/1/index.board?bmode=read&aSeq=250515&pageNo=21&rowNum=10&amSeq=&sTarget=&sTxt=) (assessed on 25 July 2017).
6. Bentayeb M.; Wagner V.; Stempfelet M.; Zins M.; Goldberg M.; Pascal M.; Larrieu S.; Veau deau P.; Cassadou S.; Eilstein D.; et al. Association between long-term exposure to air pollution and mortality in France: A 25-year follow-up study. *Environ. Int.* **2015**, *85*, 5–14
7. Carey I.M.; Atkinson R.W.; Kent A.J.; van Staa T.; Cook D.G.; Andersen H.R. Mortality associations with long-term exposure to outdoor air pollution in a national English cohort. *Am. J. Resp. Crit. Care* **2013**, *187*, 1226–1233.
8. Beelen, R.; Raaschou-Nielsen, O.; Stafoggia, M.; Andersen, Z.J.; Weinmayr, G.; Hoffmann, B.; Wolf, K.; Samoli, E.; Fischer, P.; Nieuwenhuijsen, M.; et al. Effects of long-term exposure to air pollution on natural-cause mortality: an analysis of 22 European cohorts within the multicentre ESCAPE project. *Lancet* **2014** *a*, 383, 785–795.
9. Beelen R.; Stafoggia M.; Raaschou-Nielsen O.; Andersen Z.J.; Xun W.W.; Katsouyanni K.; Diamakopoulou K.; Brunekreef B.; Weinmayr G.; Hoffmann B.; et al. Long-term exposure to air pollution and cardiovascular mortality, an analysis of 22 European cohorts. *Epidemiology* **2014** *b*, 25, 368–378.

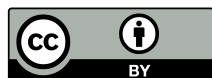

Supplement: Supplementary file 1 [file ijerph-14-01103-s001.pdf]
